# Supplementary material
Source: MDPI journal article supplement (https://www.mdpi.com/2071-1050/12/6/2471)
Supplement: s1 [file s1]

## Supplementary Material

### S.1. Aqua Regia and DTPA Extractions

The concentrations of elements were analyzed using the method described in. Briefly, 0.5 g of sample was digested using 3 ml concentrated HNO<sub>3</sub> and concentrated HCl (1:3). The bioavailable concentrations were analyzed using DTPA. The DTPA method was used, owing to the alkaline nature of EW. The extractant consisted of 0.005M DTPA, 0.1M triethanolamine, and 0.01M CaCl<sub>2</sub>, with a pH of 7.3. The soil test consisted of shaking 10 g of air-dry EW with 20 ml of extractant for 2 h. The total and bioavailable concentrations of elements were measured using an Inductively Coupled Plasma Mass Spectrometry (ICP-MS, Perkin-Elmer NexION 350X). All the reagents used were of analytical grade. All solutions were prepared from concentrated stock solutions (Sigma Aldrich). All samples were analyzed in duplicate.

### S.2. Seed Germination and Plant Growth Experiments

For the seed germination test, the seeds were made to swell in distilled water for 1 h. They were germinated in disposable Petri dishes, 100 mm in diameter, on ash-less Whatman filter paper moistened with 5 ml of either the test solution or double-distilled water (control). The test solution was prepared by using 200 g of sample of EW, which was brought to a moisture content of 85% and agitated for 2 h. The aqueous extract was obtained by filtering the solution. The aqueous extract (test solution) was then diluted with double-distilled water to obtain an extract concentration of 75% and 50%. The experiments were run in five replicates, using ten seeds per dish. The dishes were incubated in a thermostat for 24 h at 27 °C. At the end of 24 h, the germinated seeds were counted and the root length was measured with a ruler. Average value of each replicate was calculated for use in determination of Germination Index.

For plant growth experiments, base substrate was prepared by mixing silica sand and blond peat in a ratio of 1:1 in volume (Wundram et al. 1997; Blok et al. 2008). The extractive waste samples, without further dehydration, were added to the base substrate in different % (w/w): for each dosage, five replications were performed. The various mixtures obtained were placed in traditional pots (sliced off inverted cones) with square base of *c.* 5 cm side and *c.* 10 cm height containing a layer (1 cm) of expanded clay on the bottom to ensure drainage. To ensure seed germination, the mixture was covered with a layer of 1 cm of sand. Thirty seeds were used for every pot for plant growth experiments. The pots were placed in an incubator at 27°C and watered every day for 21 days. After 21 days, the plant tops were cut, and dried in an oven and the biomass was weighed.

### S.3. Quality control measurements of the analysed elements

**Table 3.** Quality control measurements of the analysed elements.

| Analyte Symbol         | Cd    | Zn    | Ga    |
|------------------------|-------|-------|-------|
| Unit Symbol            | ppm   | ppm   | ppm   |
| Detection Limit        | 0.1   | 0.2   | 0.1   |
| Analysis Method        | TD-MS | TD-MS | TD-MS |
| GXR-4 Meas             | 0.3   | 83.4  | 19.1  |
| GXR-4 Cert             | 0.86  | 73    | 20    |
| GXR-6 Meas             | < 0.1 | 141   | 28.7  |
| GXR-6 Cert             | 1     | 118   | 35    |
| OREAS 97 (4 Acid) Meas |       | 662   |       |
| OREAS 97 (4 Acid) Cert |       | 646   |       |
| OREAS 98 (4 Acid) Meas |       | 1460  |       |

|                         |       |      |       |
|-------------------------|-------|------|-------|
| OREAS 98 (4 Acid) Cert  |       | 1360 |       |
| DNC-1a Meas             |       | 68.2 | 13.3  |
| DNC-1a Cert             |       | 70   | 15    |
| SBC-1 Meas              | 0.3   | 205  | 24.5  |
| SBC-1 Cert              | 0.40  | 186  | 27.0  |
| OREAS 45d (4-Acid) Meas |       | 48   | 21.5  |
| OREAS 45d (4-Acid) Cert |       | 45.7 | 21.20 |
| OREAS 96 (4 Acid) Meas  |       | 469  |       |
| OREAS 96 (4 Acid) Cert  |       | 457  |       |
| Method Blank            | < 0.1 | 1.5  | 0.2   |
| Meas* - Measured        |       |      |       |
| Cert* - Certified       |       |      |       |

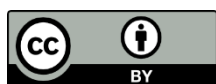

© 2020 by the authors. Submitted for possible open access publication under the terms and conditions of the Creative Commons Attribution (CC BY) license (<http://creativecommons.org/licenses/by/4.0/>).
